# Supplementary material for: Arginine Expedites Erastin-Induced Ferroptosis through Fumarate
Source: MDPI journal article supplement (doi:10.3390/ijms241914595), 2023-09-27
Supplement: s1 [file s1]

## Supplementary Figure S1

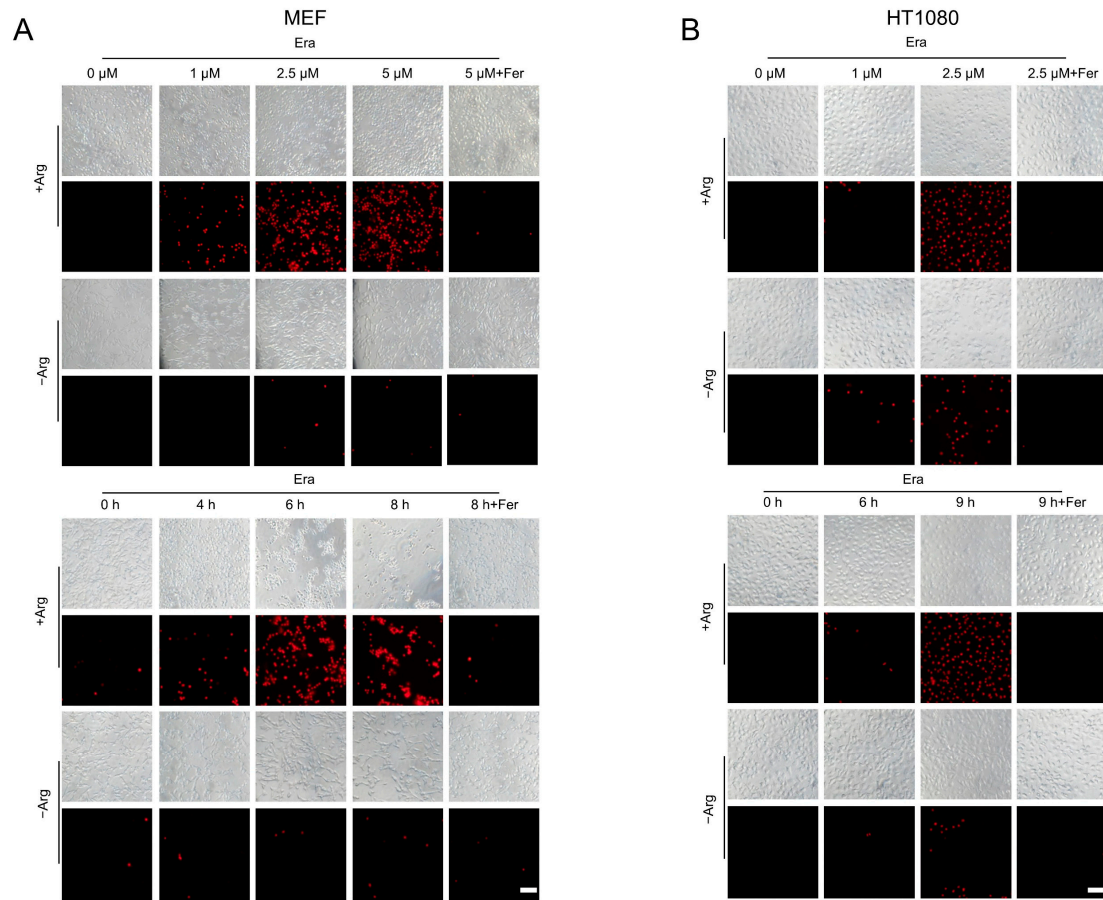

**Figure S1.** Arginine promotes erastin-induced ferroptosis in MEF and HT1080 cells. (A, B) MEF and HT1080 cells were treated with the indicated dose of erastin in the complete or arginine-depleted medium, with or without Fer for 6 h and 9 h, respectively, or treated with 2.5  $\mu$ M erastin for the indicated time in the complete or arginine-depleted medium, with or without Fer. Cell death was visualized by PI staining and fluorescent microscopy imaging. Representative images were presented. Scale bar, 100  $\mu$ m. +Arg: complete medium, -Arg: arginine-depleted medium, Era: erastin, Fer: Ferrostatin-1.
